# Supplementary material for: Defining the Distinct Skin and Gut Microbiomes of the Northern Pike (Esox lucius)
Source: Front Microbiol. 2019 Sep 12;10:2118. doi: 10.3389/fmicb.2019.02118 (PMC6751255; doi:10.3389/fmicb.2019.02118)
Supplement: Supplementary file 4 [file Table_3.xlsx]

## Sheet: Sheet2
Supplementary Data S3: Predicted Metagenomic Function: Specific Metacyc Pathways Associated with the Gut, SMS, and Water Microbiomes
MetaCyc Pathway	Full Pathway Name	Categorization	Site Association	LDA Score	p-value
PWY_6588	pyruvate fermentation to acetone	fermentation	gut	3.55668	0.000719581
PWY_5100	pyruvate fermentation to acetate and lactate II	fermentation	gut	3.54607	0.0011298
PWY_5676	acetyl-CoA fermentation to butanoate II	fermentation	gut	3.49035	0.000850439
GLYCOCAT_PWY	glycogen degradation I	complex carbohydrate utilization	gut	3.48582	0.0011298
PWY0_1296	purine ribonucleosides degradation	nucleotide degradation	gut	3.45704	0.000719581
PWY_6737	starch degradation V	complex carbohydrate utilization	gut	3.42767	0.00152622
PWY_6609	adenine and adenosine salvage III	nucleotide biosynthesis	gut	3.41389	0.000719581
PWY_621	sucrose degradation III (sucrose invertase)	simple carbohydrate utilization	gut	3.41115	0.000850439
PWY_7013	(S)-propane-1,2-diol degradation	fermentation	gut	3.41013	0.000988441
PWY_7196	superpathway of pyrimidine ribonucleosides salvage	nucleotide biosynthesis	gut	3.367	0.000719581
PWY_7377	cob(II)yrinate a,c-diamide biosynthesis I (early cobalt insertion)	adenosylcobalamin (vitamin B12) biosynthesis	gut	3.35766	0.000719581
GLCMANNANAUT_PWY	superpathway of N-acetylglucosamine, N-acetylmannosamine and N-acetylneuraminate degradation	complex carbohydrate utilization	gut	3.34953	0.000719581
PWY_6891	thiazole biosynthesis II (aerobic bacteria)	other B-vitamin biosynthesis	gut	3.34575	0.000719581
GLYCOGENSYNTH_PWY	glycogen biosynthesis I (from ADP-D-Glucose)	carbohydrate biosynthesis	gut	3.34528	0.00152622
PWY_6892	thiazole biosynthesis I (facultative anaerobic bacteria)	other B-vitamin biosynthesis	gut	3.3397	0.0011298
PWY0_1298	superpathway of pyrimidine deoxyribonucleosides degradation	nucleotide degradation	gut	3.33792	0.000719581
P161_PWY	acetylene degradation (anaerobic)	fermentation	gut	3.32052	0.00238505
PWY_2941	L-lysine biosynthesis II	amino acid biosynthesis	gut	3.31842	0.000719581
ASPASN_PWY	superpathway of L-aspartate and L-asparagine biosynthesis	amino acid biosynthesis	gut	3.31763	0.000850439
PWY_6507	4-deoxy-L-threo-hex-4-enopyranuronate degradation	complex carbohydrate utilization	gut	3.31244	0.000719581
PWY0_1297	superpathway of purine deoxyribonucleosides degradation	nucleotide degradation	gut	3.29973	0.000719581
PWY_5509	adenosylcobalamin biosynthesis from adenosylcobinamide-GDP I	adenosylcobalamin (vitamin B12) biosynthesis	gut	3.28905	0.000719581
PWY490_3	nitrate reduction VI (assimilatory)	photosynthesis	gut	3.28886	0.0011298
PWY_6269	superpathway of adenosylcobalamin salvage from cobinamide II	adenosylcobalamin (vitamin B12) biosynthesis	gut	3.27596	0.000719581
PWY_6317	D-galactose degradation I (Leloir pathway)	simple carbohydrate utilization	gut	3.27409	0.000719581
PPGPPMET_PWY	ppGpp biosynthesis	other	gut	3.27337	0.0019124
COBALSYN_PWY	superpathway of adenosylcobalamin salvage from cobinamide I	adenosylcobalamin (vitamin B12) biosynthesis	gut	3.2729	0.000719581
P163_PWY	L-lysine fermentation to acetate and butanoate	amino acid degradation	gut	3.25876	0.0011298
P441_PWY	superpathway of N-acetylneuraminate degradation	complex carbohydrate utilization	gut	3.25352	0.000719581
GALACTUROCAT_PWY	D-galacturonate degradation I	simple carbohydrate utilization	gut	3.24232	0.0011068
PWY_5104	L-isoleucine biosynthesis IV	amino acid biosynthesis	gut	3.17003	0.0014039
PWY_7222	guanosine deoxyribonucleotides de novo biosynthesis II	nucleotide biosynthesis	gut	3.16857	0.00102502
PWY_7220	adenosine deoxyribonucleotides de novo biosynthesis II	nucleotide biosynthesis	gut	3.16857	0.00102502
PWY_7242	D-fructuronate degradation	simple carbohydrate utilization	gut	3.15981	0.00360656
NONOXIPENT_PWY	pentose phosphate pathway (non-oxidative branch)	pentose phosphate pathway	gut	3.12441	0.000865762
GOLPDLCAT_PWY	superpathway of glycerol degradation to 1,3-propanediol	simple carbohydrate utilization	gut	3.11761	0.000719581
PWY0_1586	peptidoglycan maturation (meso-diaminopimelate containing)	peptidoglycan biosynthesis	gut	3.11424	0.0271916
GLUCUROCAT_PWY	superpathway of β-D-glucuronosides degradation	simple carbohydrate utilization	gut	3.10343	0.00294671
PWY_6386	UDP-N-acetylmuramoyl-pentapeptide biosynthesis II (lysine-containing)	peptidoglycan biosynthesis	gut	3.10075	0.000719581
DENOVOPURINE2_PWY	superpathway of purine nucleotides de novo biosynthesis II	nucleotide biosynthesis	gut	3.09787	0.0011298
PWY_7199	pyrimidine deoxyribonucleosides salvage	nucleotide biosynthesis	gut	3.0944	0.000850439
GALACT_GLUCUROCAT_PWY	superpathway of hexuronide and hexuronate degradation	simple carbohydrate utilization	gut	3.07954	0.000931808
PWY_7187	pyrimidine deoxyribonucleotides de novo biosynthesis II	nucleotide biosynthesis	gut	3.0707	0.000988441
CALVIN_PWY	Calvin-Benson-Bassham cycle	photosynthesis	gut	3.06371	0.000850439
TRNA_CHARGING_PWY	tRNA charging	other	gut	3.03994	0.000719581
PWY_5121	superpathway of geranylgeranyl diphosphate biosynthesis II (via MEP)	GGPP biosynthesis via MEP	gut	3.03869	0.00154466
PWY_6387	UDP-N-acetylmuramoyl-pentapeptide biosynthesis I (meso-diaminopimelate containing)	peptidoglycan biosynthesis	gut	3.03739	0.000850439
PWY_6385	peptidoglycan biosynthesis III (mycobacteria)	peptidoglycan biosynthesis	gut	3.03653	0.000719581
NONMEVIPP_PWY	methylerythritol phosphate pathway I	GGPP biosynthesis via MEP	gut	3.03545	0.00136915
PWY_7560	methylerythritol phosphate pathway II	GGPP biosynthesis via MEP	gut	3.03545	0.00136915
ANAGLYCOLYSIS_PWY	glycolysis III (from glucose)	glycolysis	gut	3.02386	0.000719581
PWY_6572	chondroitin sulfate degradation I (bacterial)	complex carbohydrate utilization	gut	3.02335	0.00231246
PWY_7229	superpathway of adenosine nucleotides de novo biosynthesis I	nucleotide biosynthesis	gut	3.02245	0.00102502
PWY_6126	superpathway of adenosine nucleotides de novo biosynthesis II	nucleotide biosynthesis	gut	3.01226	0.00119422
PEPTIDOGLYCANSYN_PWY	peptidoglycan biosynthesis I (meso-diaminopimelate containing)	peptidoglycan biosynthesis	gut	3.006	0.00102502
PWY_5189	tetrapyrrole biosynthesis II (from glycine)	vitamin/nutrient precursor	gut	3.00295	0.000931808
HEXITOLDEGSUPER_PWY	superpathway of hexitol degradation (bacteria)	simple carbohydrate utilization	gut	3.00206	0.000931808
OANTIGEN_PWY	O-antigen building blocks biosynthesis (E. coli)	LPS/S-layer biosynthesis	gut	2.97017	0.0019355
UDPNAGSYN_PWY	UDP-N-acetyl-D-glucosamine biosynthesis I	peptidoglycan and/or LPS/S-layer biosynthesis	gut	2.95388	0.0012401
P162_PWY	L-glutamate degradation V (via hydroxyglutarate)	amino acid degradation	gut	2.95269	0.00119534
PWY_7219	adenosine ribonucleotides de novo biosynthesis	nucleotide biosynthesis	gut	2.93758	0.00136915
P164_PWY	purine nucleobases degradation I (anaerobic)	nucleotide degradation	gut	2.93351	0.011385
PWY_7210	pyrimidine deoxyribonucleotides biosynthesis from CTP	nucleotide biosynthesis	gut	2.93084	0.0281157
PWY_6151	S-adenosyl-L-methionine cycle I	amino acid degradation	gut	2.9294	0.0308701
PWY_7200	superpathway of pyrimidine deoxyribonucleoside salvage	nucleotide biosynthesis	gut	2.92057	0.000719581
PWY_5686	UMP biosynthesis I	nucleotide biosynthesis	gut	2.90896	0.0045876
PWY_6123	inosine-5'-phosphate biosynthesis I	nucleotide biosynthesis	gut	2.89447	0.00171486
POLYAMSYN_PWY	superpathway of polyamine biosynthesis I	polyamine biosynthesis	gut	2.89341	0.0041245
THISYN_PWY	superpathway of thiamine diphosphate biosynthesis I	other B-vitamin biosynthesis	gut	2.87321	0.0221033
PWY_7221	guanosine ribonucleotides de novo biosynthesis	nucleotide biosynthesis	gut	2.86848	0.00229059
PWY_7328	superpathway of UDP-glucose-derived O-antigen building blocks biosynthesis	LPS/S-layer biosynthesis	gut	2.85451	0.00203669
PWY_5347	superpathway of L-methionine biosynthesis (transsulfuration)	amino acid biosynthesis	gut	2.85113	0.0138735
PWY_2942	L-lysine biosynthesis III	amino acid biosynthesis	gut	2.84918	0.0114052
POLYAMINSYN3_PWY	superpathway of polyamine biosynthesis II	polyamine biosynthesis	gut	2.84903	0.00289032
PWY_5188	tetrapyrrole biosynthesis I (from glutamate)	vitamin/nutrient precursor	gut	2.83652	0.0011068
COA_PWY	coenzyme A biosynthesis I (prokaryotic)	cofactors and accessories	gut	2.83469	0.00333592
PWY_7198	pyrimidine deoxyribonucleotides de novo biosynthesis IV	nucleotide biosynthesis	gut	2.83215	0.0281157
FUCCAT_PWY	fucose degradation	simple carbohydrate utilization	gut	2.8123	0.00152622
THRESYN_PWY	superpathway of L-threonine biosynthesis	amino acid biosynthesis	gut	2.80735	0.00154466
PWY_6612	superpathway of tetrahydrofolate biosynthesis	other B-vitamin biosynthesis	gut	2.80632	0.00289032
FOLSYN_PWY	superpathway of tetrahydrofolate biosynthesis and salvage	other B-vitamin biosynthesis	gut	2.79884	0.000865762
P461_PWY	hexitol fermentation to lactate, formate, ethanol and acetate	fermentation	gut	2.79307	0.00437289
PHOSLIPSYN_PWY	superpathway of phospholipid biosynthesis I (bacteria)	phospholipid biosynthesis	gut	2.78916	0.00361259
PWY_5667	CDP-diacylglycerol biosynthesis I	phospholipid biosynthesis	gut	2.75766	0.0222492
RIBOSYN2_PWY	flavin biosynthesis I (bacteria and plants)	other B-vitamin biosynthesis	gut	2.74648	0.0276469
PWY4FS_7	phosphatidylglycerol biosynthesis I (plastidic)	phospholipid biosynthesis	gut	2.74021	0.00562958
PWY4FS_8	phosphatidylglycerol biosynthesis II (non-plastidic)	phospholipid biosynthesis	gut	2.74021	0.00562958
PWY_5097	L-lysine biosynthesis VI	amino acid biosynthesis	gut	2.7193	0.0138735
KDO_NAGLIPASYN_PWY	superpathway of (KDO)2-lipid A biosynthesis	LPS/S-layer biosynthesis	gut	2.70817	0.0274627
GLYCOLYSIS	glycolysis I (from glucose 6-phosphate)	glycolysis	gut	2.7075	0.00849857
PWY_6628	superpathway of L-phenylalanine biosynthesis	amino acid biosynthesis	gut	2.70424	0.0112773
PWY0_166	superpathway of pyrimidine deoxyribonucleotides de novo biosynthesis (E. coli)	nucleotide biosynthesis	gut	2.70312	0.00240305
PWY_6125	superpathway of guanosine nucleotides de novo biosynthesis II	nucleotide biosynthesis	gut	2.68206	0.00758582
PWY_841	superpathway of purine nucleotides de novo biosynthesis I	nucleotide biosynthesis	gut	2.66433	0.00287017
PWY0_1319	CDP-diacylglycerol biosynthesis II	phospholipid biosynthesis	gut	2.66381	0.0222492
DAPLYSINESYN_PWY	L-lysine biosynthesis I	amino acid biosynthesis	gut	2.64952	0.0288503
PWY_6749	CMP-legionaminate biosynthesis I	other	gut	2.63418	0.0328011
ANAEROFRUCAT_PWY	homolactic fermentation	fermentation	gut	2.60035	0.0167845
FUC_RHAMCAT_PWY	superpathway of fucose and rhamnose degradation	simple carbohydrate utilization	gut	2.56577	0.00318877
PWY_5177	glutaryl-CoA degradation	other aromatic compound degradation	gut	2.40108	0.0114052
ECASYN_PWY	enterobacterial common antigen biosynthesis	LPS/S-layer biosynthesis	gut	2.37478	0.0254523
PWY_7094	fatty acid salvage	fatty acid biosynthesis	SMS	3.41395	0.00171558
FAO_PWY	fatty acid beta-oxidation I	fatty acid degradation	SMS	3.37628	0.00152622
REDCITCYC	TCA cycle VIII (helicobacter)	TCA cycle and alternatives	SMS	3.2738	0.00384498
PWY_5971	palmitate biosynthesis II (bacteria and plants)	fatty acid biosynthesis	SMS	3.24684	0.000988441
HEMESYN2_PWY	heme b biosynthesis II (anaerobic)	heme b biosynthesis	SMS	3.20822	0.000850439
TCA_GLYOX_BYPASS	superpathway of glyoxylate bypass and TCA	TCA cycle and alternatives	SMS	3.20207	0.00171558
FASYN_ELONG_PWY	fatty acid elongation -- saturated	fatty acid biosynthesis	SMS	3.19187	0.00171558
PWY_7111	pyruvate fermentation to isobutanol (engineered)	fermentation	SMS	3.18199	0.00171558
LEU_DEG2_PWY	L-leucine degradation I	amino acid degradation	SMS	3.18023	0.00126126
SULFATE_CYS_PWY	superpathway of sulfate assimilation and cysteine biosynthesis	amino acid biosynthesis	SMS	3.16697	0.00126998
P23_PWY	reductive TCA cycle I	TCA cycle and alternatives	SMS	3.1603	0.00753529
GLYOXYLATE_BYPASS	glyoxylate cycle	TCA cycle and alternatives	SMS	3.15629	0.00177388
PWY_5857	ubiquinol-10 biosynthesis (prokaryotic)	ubiquinone (coenzyme Q10) biosynthesis	SMS	3.15413	0.00171558
PWY_5855	ubiquinol-7 biosynthesis (prokaryotic)	ubiquinone (coenzyme Q10) biosynthesis	SMS	3.14083	0.00171558
PWY_5856	ubiquinol-9 biosynthesis (prokaryotic)	ubiquinone (coenzyme Q10) biosynthesis	SMS	3.14083	0.00171558
PWY_6708	ubiquinol-8 biosynthesis (prokaryotic)	ubiquinone (coenzyme Q10) biosynthesis	SMS	3.14083	0.00171558
PWYG_321	mycolate biosynthesis	fatty acid biosynthesis	SMS	3.13848	0.00119422
SO4ASSIM_PWY	assimilatory sulfate reduction I	amino acid biosynthesis	SMS	3.13745	0.000988441
UBISYN_PWY	superpathway of ubiquinol-8 biosynthesis (prokaryotic)	ubiquinone (coenzyme Q10) biosynthesis	SMS	3.13072	0.00163171
PWY_5989	stearate biosynthesis II (bacteria and plants)	fatty acid biosynthesis	SMS	3.12176	0.00136915
PWY_5345	superpathway of L-methionine biosynthesis (by sulfhydrylation)	amino acid biosynthesis	SMS	3.1134	0.00171558
SALVADEHYPOX_PWY	adenosine nucleotides degradation II	nucleotide degradation	SMS	3.10922	0.0126805
PWY_7664	oleate biosynthesis IV (anaerobic)	fatty acid biosynthesis	SMS	3.09098	0.00187346
PWY_6282	palmitoleate biosynthesis I (from (5Z)-dodec-5-enoate)	fatty acid biosynthesis	SMS	3.09076	0.00171486
HEME_BIOSYNTHESIS_II	heme b biosynthesis I (aerobic)	heme b biosynthesis	SMS	3.08399	0.000988441
PWY_6467	Kdo transfer to lipid IVA III (Chlamydia)	LPS/S-layer biosynthesis	SMS	3.07997	0.0011298
PWY0_862	(5Z)-dodecenoate biosynthesis I	fatty acid biosynthesis	SMS	3.07306	0.00221808
PWY_7254	TCA cycle VII (acetate-producers)	TCA cycle and alternatives	SMS	3.06341	0.00694875
PWY_5918	superpathay of heme b biosynthesis from glutamate	heme b biosynthesis	SMS	3.04024	0.00126998
PWY_5920	superpathway of b heme biosynthesis from glycine	heme b biosynthesis	SMS	3.03813	0.000719581
FASYN_INITIAL_PWY	superpathway of fatty acid biosynthesis initiation (E. coli)	fatty acid biosynthesis	SMS	3.03052	0.00187346
PROTOCATECHUATE_ORTHO_CLEAVAGE_PWY	protocatechuate degradation II (ortho-cleavage pathway)	other aromatic compound degradation	SMS	3.00173	0.000719581
TYRFUMCAT_PWY	L-tyrosine degradation I	amino acid degradation	SMS	2.97644	0.0014039
PWY_5154	L-arginine biosynthesis III (via N-acetyl-L-citrulline)	amino acid biosynthesis	SMS	2.97014	0.00126998
P124_PWY	Bifidobacterium shunt	fermentation	SMS	2.92543	0.00294671
PWY_7431	aromatic biogenic amine degradation (bacteria)	other aromatic compound degradation	SMS	2.91936	0.00213068
PWY_3661	glycine betaine degradation I	amine/polyamine degradation	SMS	2.90311	0.000667278
P122_PWY	heterolactic fermentation	fermentation	SMS	2.88355	0.0014039
PWY_7376	cob(II)yrinate a,c-diamide biosynthesis II (late cobalt incorporation)	adenosylcobalamin (vitamin B12) biosynthesis	SMS	2.87464	0.000667278
PYRIDOXSYN_PWY	pyridoxal 5'-phosphate biosynthesis I	other B-vitamin biosynthesis	SMS	2.85835	0.00922364
GLYCOLYSIS_E_D	superpathway of glycolysis and the Entner-Doudoroff pathway	glycolysis	SMS	2.80889	0.0497871
PWY_1622	formaldehyde assimilation I (serine pathway)	1-carbon compound utilization	SMS	2.75267	0.00105262
PWY_5182	toluene degradation II (aerobic) (via 4-methylcatechol)	toluene degradation	SMS	2.73154	0.000719581
PWY_5180	toluene degradation I (aerobic) (via o-cresol)	toluene degradation	SMS	2.73154	0.000719581
PWY0_1241	ADP-L-glycero-beta-D-manno-heptose biosynthesis	LPS/S-layer biosynthesis	SMS	2.72236	0.0133658
CATECHOL_ORTHO_CLEAVAGE_PWY	catechol degradation to beta-ketoadipate	other aromatic compound degradation	SMS	2.69415	0.00158887
PWY_5273	p-cumate degradation	other aromatic compound degradation	SMS	2.68996	0.000617793
PWY_5266	p-cymene degradation	other aromatic compound degradation	SMS	2.68987	0.000617793
PWY_5415	catechol degradation I (meta-cleavage pathway)	other aromatic compound degradation	SMS	2.6871	0.000719581
PWY_5181	toluene degradation III (aerobic) (via p-cresol)	toluene degradation	SMS	2.67971	0.000719581
PWY_5724	superpathway of atrazine degradation	other aromatic compound degradation	SMS	2.67862	0.00302885
SUCSYN_PWY	sucrose biosynthesis I (from photosynthesis)	photosynthesis	SMS	2.67732	0.0011298
PWY0_1415	superpathway of heme b biosynthesis from uroporphyrinogen-III	heme b biosynthesis	SMS	2.67465	0.0214574
NADSYN_PWY	NAD de novo biosynthesis II (from tryptophan)	cofactors and accessories	SMS	2.66655	0.00168876
P381_PWY	adenosylcobalamin biosynthesis II (aerobic)	adenosylcobalamin (vitamin B12) biosynthesis	SMS	2.66088	0.000667278
PWY_5419	catechol degradation to 2-hydroxypentadienoate II	other aromatic compound degradation	SMS	2.6608	0.00243946
PWY0_321	phenylacetate degradation I (aerobic)	other aromatic compound degradation	SMS	2.65955	0.000719581
PWY_5420	catechol degradation II (meta-cleavage pathway)	other aromatic compound degradation	SMS	2.65836	0.00177388
PWY_6728	methylaspartate cycle	TCA cycle and alternatives	SMS	2.64942	0.000667278
KETOGLUCONMET_PWY	ketogluconate metabolism	simple carbohydrate utilization	SMS	2.64822	0.00180377
P281_PWY	3-phenylpropanoate degradation	lignin-derivative degradation	SMS	2.6251	0.00142642
PWY_7159	3,8-divinyl-chlorophyllide a biosynthesis III (aerobic, light independent)	photosynthesis	SMS	2.57731	0.00131096
PWY_5531	3,8-divinyl-chlorophyllide a biosynthesis II (anaerobic)	photosynthesis	SMS	2.57731	0.00131096
PWY_5941	diethylphosphate degradation	other	SMS	2.56736	0.0129481
PWY_6703	preQ0 biosynthesis	nucleotide biosynthesis	SMS	2.56677	0.0049541
PWY_3801	sucrose degradation II (sucrose synthase)	simple carbohydrate utilization	SMS	2.56215	0.000698316
PWY_6471	peptidoglycan biosynthesis IV (Enterococcus faecium)	peptidoglycan biosynthesis	SMS	2.56203	0.0277423
PWY_5430	meta cleavage pathway of aromatic compounds	other aromatic compound degradation	SMS	2.55487	0.00167089
GLUCARDEG_PWY	D-glucarate degradation I	simple carbohydrate utilization	SMS	2.5287	0.00213068
PWY_5507	adenosylcobalamin biosynthesis I (anaerobic)	adenosylcobalamin (vitamin B12) biosynthesis	SMS	2.51595	0.00187346
PWY_5651	L-tryptophan degradation to 2-amino-3-carboxymuconate semialdehyde	amino acid degradation	SMS	2.50709	0.00168876
PWY_6185	4-methylcatechol degradation (ortho cleavage)	other aromatic compound degradation	SMS	2.4984	0.000698316
PWY_5741	ethylmalonyl-CoA pathway	TCA cycle and alternatives	SMS	2.4739	0.000667278
PWY_5265	peptidoglycan biosynthesis II (staphylococci)	peptidoglycan biosynthesis	SMS	2.46939	0.00522636
PWY_6876	isopropanol biosynthesis (engineered)	carbohydrate biosynthesis	SMS	2.46103	0.0169253
f_3_HYDROXYPHENYLACETATE_DEGRADATION_PWY	4-hydroxyphenylacetate degradation	other aromatic compound degradation	SMS	2.46086	0.00238505
PWY_6992	1,5-anhydrofructose degradation	simple carbohydrate utilization	SMS	2.44666	0.000667278
PWY_5655	L-tryptophan degradation IX	amino acid degradation	SMS	2.44437	0.00105262
PWY_6071	superpathway of phenylethylamine degradation	other aromatic compound degradation	SMS	2.42482	0.000719581
PWY_5654	2-amino-3-carboxymuconate semialdehyde degradation to 2-hydroxypentadienoate	other aromatic compound degradation	SMS	2.42161	0.00175714
PWY_5529	superpathway of bacteriochlorophyll a biosynthesis	photosynthesis	SMS	2.42003	0.00166049
PWY_5183	superpathway of aerobic toluene degradation	toluene degradation	SMS	2.40351	0.000825879
PWY_6505	L-tryptophan degradation XII (Geobacillus)	amino acid degradation	SMS	2.40177	0.00142642
PWY0_1277	3-phenylpropanoate and 3-(3-hydroxyphenyl)propanoate degradation	other aromatic compound degradation	SMS	2.39957	0.00131096
PWY_7090	UDP-2,3-diacetamido-2,3-dideoxy-α-D-mannuronate biosynthesis	LPS/S-layer biosynthesis	SMS	2.39682	0.0173838
GALACTARDEG_PWY	D-galactarate degradation I	simple carbohydrate utilization	SMS	2.39432	0.00213068
GLUCARGALACTSUPER_PWY	superpathway of D-glucarate and D-galactarate degradation	simple carbohydrate utilization	SMS	2.39432	0.00213068
PWY_6700	queuosine biosynthesis	nucleotide biosynthesis	SMS	2.39389	0.0418413
PWY_5178	toluene degradation IV (aerobic) (via catechol)	toluene degradation	SMS	2.3869	0.00172791
PWY_7352	daunorubicin biosynthesis	antibiotic biosynthesis	SMS	2.37631	0.0125258
PWY_5910	superpathway of geranylgeranyldiphosphate biosynthesis I (via mevalonate)	GGPP biosynthesis via mevalonate	SMS	2.34843	0.000698316
PWY_5705	allantoin degradation to glyoxylate III	amine/polyamine degradation	SMS	2.33846	0.0114052
PWY_5647	2-nitrobenzoate degradation I	other aromatic compound degradation	SMS	2.33387	0.00166049
PWY_6562	norspermidine biosynthesis	polyamine biosynthesis	SMS	2.33249	0.000714221
PWY_7524	mevalonate pathway III (archaea)	GGPP biosynthesis via mevalonate	SMS	2.29717	0.00738732
PWY_1882	superpathway of C1 compounds oxidation to CO2	1-carbon compound utilization	SMS	2.29036	0.000854318
PWY_7347	sucrose biosynthesis III	carbohydrate biosynthesis	SMS	2.26088	0.0011298
PWY_6957	mandelate degradation to acetyl-CoA	other aromatic compound degradation	SMS	2.26043	0.00105262
AST_PWY	L-arginine degradation II (AST pathway)	amino acid degradation	SMS	2.2574	0.00860304
CHLOROPHYLL_SYN	3,8-divinyl-chlorophyllide a biosynthesis I (aerobic, light-dependent)	photosynthesis	SMS	2.25008	0.00168876
P101_PWY	ectoine biosynthesis	polyamine biosynthesis	SMS	2.2412	0.0241903
PWY_1361	benzoyl-CoA degradation I (aerobic)	other aromatic compound degradation	SMS	2.2295	0.000548661
PWY_922	mevalonate pathway I	GGPP biosynthesis via mevalonate	SMS	2.21041	0.000698316
ARGDEG_PWY	superpathway of L-arginine, putrescine, and 4-aminobutanoate degradation	amino acid degradation	SMS	2.20745	0.00279767
ORNARGDEG_PWY	superpathway of L-arginine and L-ornithine degradation	amino acid degradation	SMS	2.2074	0.00279767
PWY_6641	superpathway of sulfolactate degradation	other	SMS	2.20499	0.000667278
PWY_5737	(5R)-carbapenem carboxylate biosynthesis	antibiotic biosynthesis	SMS	2.19433	0.00043473
PWY_6210	2-aminophenol degradation	other aromatic compound degradation	SMS	2.16712	0.00131096
METHGLYUT_PWY	superpathway of methylglyoxal degradation	other	SMS	2.14217	0.000667278
PWY_5088	L-glutamate degradation VIII (to propanoate)	amino acid degradation	SMS	2.13464	0.00119422
PWY_722	nicotinate degradation I	other aromatic compound degradation	SMS	2.13166	0.00168876
DHGLUCONATE_PYR_CAT_PWY	glucose degradation (oxidative)	simple carbohydrate utilization	SMS	2.11794	0.000667278
PWY_7354	aclacinomycin biosynthesis	antibiotic biosynthesis	SMS	2.10724	0.0113874
PWY_6598	sciadonate biosynthesis	fatty acid biosynthesis	SMS	2.08749	0.00428254
PWY_5679	clavulanate biosynthesis	antibiotic biosynthesis	SMS	2.0856	0.00271659
PWY_6470	peptidoglycan biosynthesis V (beta-lactam resistance)	peptidoglycan biosynthesis	SMS	2.06452	0.00280137
PWY_7616	methanol oxidation to carbon dioxide	1-carbon compound utilization	SMS	2.0517	0.00079
HCAMHPDEG_PWY	3-phenylpropanoate and 3-(3-hydroxyphenyl)propanoate degradation to 2-hydroxypentadienoate	other aromatic compound degradation	SMS	2.02484	0.00142642
PWY_6690	cinnamate and 3-hydroxycinnamate degradation to 2-hydroxypentadienoate	other aromatic compound degradation	SMS	2.02483	0.00142642
PWY_6662	superpathway of quinolone and alkylquinolone biosynthesis	antibiotic biosynthesis	SMS	2.00769	0.000824705
PWY_3781	aerobic respiration I (cytochrome c)	respiration	water	3.8074	0.000719581
TCA	TCA cycle I (prokaryotic)	TCA cycle and alternatives	water	3.41596	0.000719581
P105_PWY	TCA cycle IV (2-oxoglutarate decarboxylase)	TCA cycle and alternatives	water	3.39229	0.000988441
PWY_6969	TCA cycle V (2-oxoglutarate: ferredoxin oxidoreductase)	TCA cycle and alternatives	water	3.30992	0.000988441
GLUTORN_PWY	L-ornithine biosynthesis I	amino acid biosynthesis	water	3.28285	0.000719581
TRPSYN_PWY	L-tryptophan biosynthesis	amino acid biosynthesis	water	3.27622	0.000719581
VALSYN_PWY	L-valine biosynthesis	amino acid biosynthesis	water	3.25925	0.000719581
HSERMETANA_PWY	L-methionine biosynthesis III	amino acid biosynthesis	water	3.2589	0.00119534
GLYCOLYSIS_TCA_GLYOX_BYPASS	superpathway of glycolysis, pyruvate dehydrogenase, TCA, and glyoxylate bypass	TCA cycle and alternatives	water	3.24506	0.00428743
ARGSYNBSUB_PWY	L-arginine biosynthesis II (acetyl cycle)	amino acid biosynthesis	water	3.22434	0.00360656
PWY0_1479	tRNA processing	other	water	3.20265	0.000719581
ILEUSYN_PWY	L-isoleucine biosynthesis I (from threonine)	amino acid biosynthesis	water	3.19488	0.000719581
PWY_7323	superpathway of GDP-mannose-derived O-antigen building blocks biosynthesis	LPS/S-layer biosynthesis	water	3.18792	0.00437289
PWY_5101	L-isoleucine biosynthesis II	amino acid biosynthesis	water	3.16883	0.000719581
HISTSYN_PWY	L-histidine biosynthesis	amino acid biosynthesis	water	3.13967	0.000719581
PWY_5913	partial TCA cycle (obligate autotrophs)	TCA cycle and alternatives	water	3.13246	0.00736722
PWY_181	photorespiration	photosynthesis	water	3.11689	0.00203669
SER_GLYSYN_PWY	superpathway of L-serine and glycine biosynthesis I	amino	water	3.10005	0.0104256
PWY_7211	superpathway of pyrimidine deoxyribonucleotides de novo biosynthesis	nucleotide biosynthesis	water	3.0957	0.0114052
PWY_6147	6-hydroxymethyl-dihydropterin diphosphate biosynthesis I	vitamin/nutrient precursor	water	3.07631	0.0303333
PWY_7237	myo-, chiro-, and scyllo-inositol degradation	simple carbohydrate utilization	water	3.06623	0.00776617
BRANCHED_CHAIN_AA_SYN_PWY	superpathway of branched chain amino acid biosynthesis	amino acid biosynthesis	water	3.05555	0.00119534
PWY_7234	inosine-5'-phosphate biosynthesis III	nucleotide biosynthesis	water	3.04829	0.00238505
PWY1G_0	mycothiol biosynthesis	other	water	3.02642	0.000698316
PENTOSE_P_PWY	pentose phosphate pathway	pentose phosphate pathway	water	3.02243	0.00599673
P221_PWY	octane oxidation	complex carbohydrate utilization	water	3.00759	0.00105262
PWY_1861	formaldhyde assimilation II (assimilatory RuMP cycle)	1-carbon compound utilization	water	3.0055	0.0290832
PWY_6353	purine nucleotides degradation II (aerobic)	nucleotide degradation	water	3.00513	0.0114052
PYRIDNUCSYN_PWY	NAD de novo biosynthesis I (from aspartate)	cofactors and accessories	water	2.98908	0.0195795
PWY_5659	GDP-mannose biosynthesis	carbohydrate biosynthesis	water	2.96032	0.00354977
PWY_6263	superpathway of menaquinol-8 biosynthesis II	menaquinone (vitamin K2) biosynthesis	water	2.95992	0.0021746
PWY_7400	L-arginine biosynthesis IV (archaebacteria)	amino acid biosynthesis	water	2.93773	0.0499746
ARGSYN_PWY	L-arginine biosynthesis I	amino acid biosynthesis	water	2.93101	0.0499746
PWY_5838	superpathway of menaquinol-8 biosynthesis	menaquinone (vitamin K2) biosynthesis	water	2.9194	0.00525245
PWY_5898	superpathway of menaquinol-12 biosynthesis	menaquinone (vitamin K2) biosynthesis	water	2.91868	0.00736722
PWY_5103	L-isoleucine biosynthesis III	amino acid biosynthesis	water	2.90452	0.0285148
PANTO_PWY	phosphopantonoate bioynthesis I	cofactors and accessories	water	2.90145	0.00294671
PWY_5899	superpathway of menaquinol-13 biosynthesis	menaquinone (vitamin K2) biosynthesis	water	2.89337	0.00736722
PWY_5897	superpathway of menaquinol-11 biosynthesis	menaquinone (vitamin K2) biosynthesis	water	2.88855	0.00736722
PWY_5840	superpathway of menaquinol-7 biosynthesis	menaquinone (vitamin K2) biosynthesis	water	2.87364	0.00995219
RUMP_PWY	formaldehyde oxidation I	1-carbon compound utilization	water	2.86145	0.00949038
PWY_5747	2-methylcitrate cycle II	fatty acid biosynthesis	water	2.85812	0.00158887
PWY_5028	L-histidine degradation II	amino acid degradation	water	2.85074	0.00180377
PWY_5861	superpathway of demethylmenaquinol-8 biosynthesis I	menaquinone (vitamin K2) biosynthesis	water	2.81261	0.00995219
PWY0_42	2-methylcitrate cycle I	fatty acid biosynthesis	water	2.79524	0.00175714
PWY_7228	superpathway of guanosine nucleotides de novo biosynthesis I	nucleotide biosynthesis	water	2.79249	0.045792
PWY_6163	chorismate biosynthesis from 3-dehydroquinate	aromatic compound biosynthesis	water	2.78342	0.0217893
PANTOSYN_PWY	superpathway of coenzyme A biosynthesis I (bacteria)	cofactors and accessories	water	2.78195	0.0328937
PWY_7208	superpathway of pyrimidine nucleobases salvage	nucleotide biosynthesis	water	2.78003	0.00187346
PWY_5417	catechol degradation III (ortho-cleavage pathway)	other aromatic compound degradation	water	2.74478	0.00109846
PWY_3001	superpathway of l-isoleucine biosynthesis I	amino acid biosynthesis	water	2.73128	0.00656295
ARO_PWY	chorismate biosynthesis I	aromatic compound biosynthesis	water	2.73035	0.0227567
PWY_6339	syringate degradation	lignin-derivative degradation	water	2.72892	0.000919635
PWY_6182	superpathways of salicylate degradation	other aromatic compound degradation	water	2.72882	0.00109846
PWY_5863	superpathway of phylloquinol biosynthesis	phylloquinone (vitamin K1) biosynthesis	water	2.72505	0.00437289
PWY_5431	aromatic compounds degradation via beta-ketoadipate	other aromatic compound degradation	water	2.69317	0.00109846
PWY0_162	superpathways of pyrimidine ribonucleosides de novo biosynthesis	nucleotide biosynthesis	water	2.6823	0.0033092
PWY_5837	2-carboxy-1,4-naphthoquinol biosynthesis	menaquinone (vitamin K2) biosynthesis	water	2.67313	0.00360656
DENITRIFICATION_PWY	nitrate reduction I (denitrification)	respiration	water	2.6727	0.00152622
COMPLETE_ARO_PWY	superpathway of aromatic amino acid biosynthesis	amino acid biosynthesis	water	2.65499	0.011831
PWY_5304	superpathway of sulfur oxidation (Acidanus ambivalens)	other	water	2.63659	0.0453399
PWY_7371	1,4-dihydroxy-6-naphthoate biosynthesis II	menaquinone (vitamin K2) biosynthesis	water	2.62439	0.0024368
METHYLGALLATE_DEGRADATION_PWY	methylgallate degradation	lignin-derivative degradation	water	2.60445	0.00158887
PWY_6383	mono-trans, poly-cis decaprenyl phosphate biosynthesis	peptidoglycan biosynthesis	water	2.60351	0.0114052
P184_PWY	protocatechuate degradation I (meta-cleavage pathway)	other aromatic compound degradation	water	2.57655	0.00152608
GALLATE_DEGRADATION_I_PWY	gallate degradation II	lignin-derivative degradation	water	2.51899	0.00158887
PWY_7374	1,4-dihydroxy-6-naphthoate biosynthesis I	menaquinone (vitamin K2) biosynthesis	water	2.50858	0.00283
PWY_6630	superpathway of L-tyrosine biosynthesis	amino acid biosynthesis	water	2.47804	0.0219171
PWY_7098	vanillin and vanillate degradation II	lignin-derivative degradation	water	2.43191	0.00118467
PWY_5484	glycolysis II (from fructose-6-phosphate)	glycolysis	water	2.4155	0.0256043
PWY_7097	vanillin and vanillate degradation I	lignin-derivative degradation	water	2.40977	0.00118467
PWY_6338	superpathway of vanillin and vanillate degradation	lignin-derivative degradation	water	2.39741	0.00118467
PWY_7295	L-arabinose degradation IV	simple carbohydrate utilization	water	2.3052	0.00122429
PWY_7007	methyl ketone biosynthesis (engineered)	fatty acid biosynthesis	water	2.2776	0.00142642
GALLATE_DEGRADATION_II_PWY	gallate degradation I	lignin-derivative degradation	water	2.22228	0.00123535
P261_PWY	coenzyme M biosynthesis I	cofactors and accessories	water	2.12215	0.000667278
CRNFORCAT_PWY	creatinine degradation I	amino acid degradation	water	2.05049	0.00152608
PWY_6581	spirilloxanthin and 2,2'-diketo-spirilloxanthin biosynthesis	photosynthesis	water	2.04599	0.000617793
